# Supplementary material
Source: publisher figshare collection journal article supplement (https://acs.figshare.com/ndownloader/files/3956077)
Supplement: Supplementary file 1 [file 3956077]

## Supporting Information

### “Thermodynamics of Formation of the Insulin Hexamer: Metal-Stabilized Proton-Coupled Assembly of Quaternary Structure”

Margaret C. Carpenter and Dean E. Wilcox

#### Table of Contents

- Page 2** **Figure S1.** UV-CD spectra of a fresh insulin sample prior to ITC measurement and the  $T_3R_3$ ' sample prepared by addition of  $Zn^{2+}$ ,  $Ca^{2+}$  and  $Cl^-$  to this insulin in an ITC measurement, as well as a spectrum of a freshly prepared  $T_3R_3$ ' insulin sample; the thermogram of the ITC measurement.
- Page 3** **Figure S2.** TEM picture of a  $T_3R_3$ ' sample prepared by addition of  $Zn^{2+}$ ,  $Ca^{2+}$  and  $Cl^-$  to insulin in an ITC measurement; the thermogram of the ITC measurement.
- Page 4** **Figure S3.** DSC thermogram of a freshly prepared  $T_3R_3$ ' insulin sample and a  $T_3R_3$ ' sample prepared by addition of  $Zn^{2+}$ ,  $Ca^{2+}$  and  $Cl^-$  to insulin in an ITC measurement, as well as a DSC thermogram of a fibrillated insulin sample; the thermogram of the ITC measurement.
- Page 5** **Figure S4.** DSC thermogram of the resulting insulin sample after an ITC measurement of EDTA chelation of  $Zn^{2+}$  from a  $T_3R_3$  sample; the thermogram of the ITC measurement.
- Page 6** **Figure S5.** Best fit of  $T_3R_3$ ' chelation thermogram to a two-sites binding model.
- Figure S6.** Best fit of  $T_6$  chelation thermogram to a two-sites binding model.
- Page 7** **Figure S7.** Analysis of the enthalpy of ITC measurements of EDTA chelation of  $Zn^{2+}$  from  $T_3R_3$  insulin in three different buffers, which allows determination of coupled (de)protonation upon  $Zn^{2+}$  binding, as indicated in the figure caption.
- Page 8** **Figure S8.** The best fit of the second event in the ITC thermogram of an EDTA chelation of  $Zn^{2+}$  from  $T_3R_3$  insulin using a competition binding model.

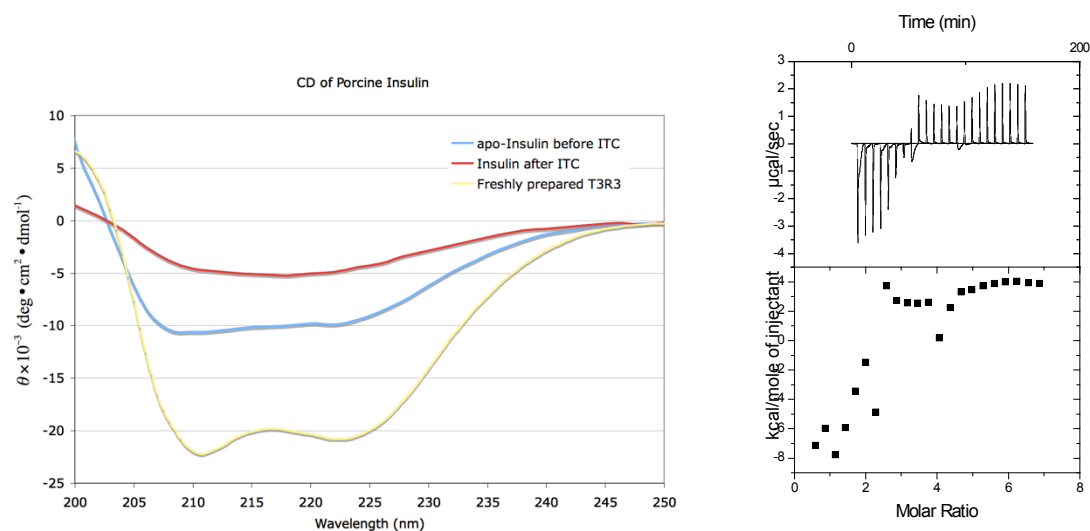

**Figure S1.** (left) UV CD spectra of insulin; blue spectrum: fresh insulin sample prior to ITC measurement; yellow spectrum:  $T_3R_3$ ' sample prepared by direct addition of the appropriate stoichiometric amounts of  $\text{Zn}^{2+}$ ,  $\text{Ca}^{2+}$  and  $\text{Cl}^-$  to insulin; red spectrum:  $T_3R_3$ ' sample prepared by addition of  $\text{Zn}^{2+}$ ,  $\text{Ca}^{2+}$  and  $\text{Cl}^-$  to insulin through an ITC experiment; (right) ITC thermogram of the insulin sample used for the red CD spectrum:  $1.6 \text{ mM ZnCl}_2 + 1.6 \text{ mM CaCl}_2 \rightarrow 0.05 \text{ mM}$  porcine insulin monomer,  $7 \text{ mM}$  phosphate buffer,  $\text{pH } 7.4$ ,  $25 \pm 0.2 \text{ }^\circ\text{C}$ .

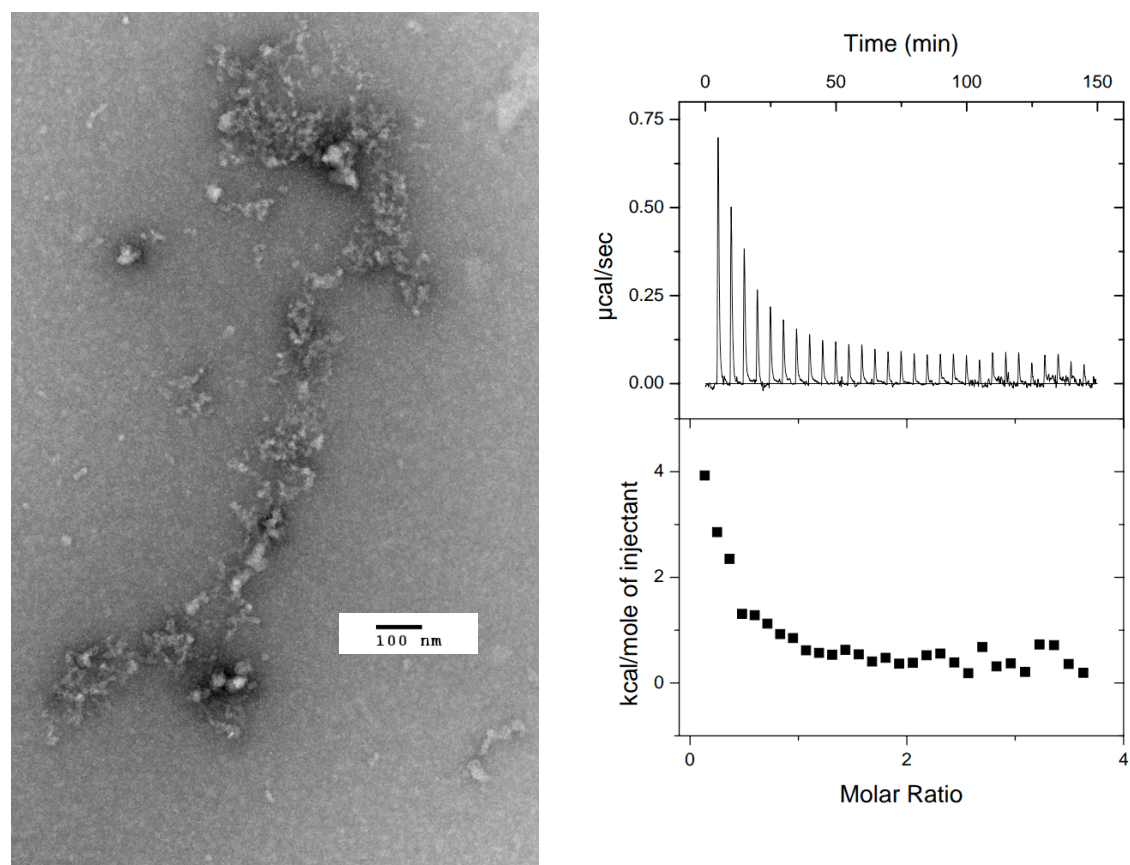

**Figure S2.** (left) Transmission electron microscopy (TEM) image of a  $T_3R_3'$  insulin sample prepared by addition of  $\text{Zn}^{2+}$ ,  $\text{Ca}^{2+}$  and  $\text{Cl}^-$  to insulin through an ITC experiment; (right) ITC thermogram of  $T_3R_3'$  insulin sample used for the TEM image:  $0.8 \text{ mM ZnCl}_2 + 0.8 \text{ mM CaCl}_2 \rightarrow 0.05 \text{ mM porcine insulin monomer}$ ,  $50 \text{ mM ACES buffer}$ ,  $\text{pH } 7.4$ ,  $25 \pm 0.2 \text{ }^\circ\text{C}$ .

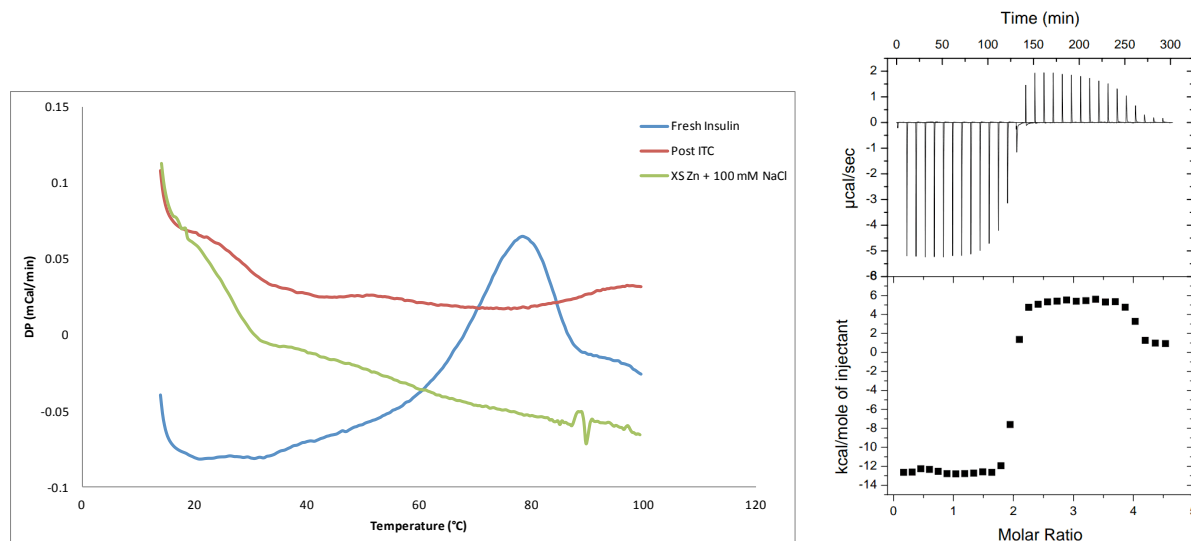

**Figure S3.** (left) DSC thermograms of insulin; blue: fresh  $T_3R_3$  sample prepared by direct addition of the appropriate stoichiometric amounts of  $Zn^{2+}$ ,  $Ca^{2+}$  and  $Cl^-$  to insulin; green: insulin sample with excess  $Zn^{2+}$  and NaCl added to concentrations known to induce aggregation (fibrillation); red:  $T_6$  sample prepared by addition of  $Zn^{2+}$  and  $Ca^{2+}$  to insulin through an ITC experiment; (right) ITC thermogram of insulin sample used for the red DSC thermogram: 1 mM  $ZnSO_4$  + 1 mM  $CaSO_4 \rightarrow$  0.05 mM porcine insulin monomer, 50 mM ACES buffer, pH 7.4,  $25 \pm 0.2$  °C.

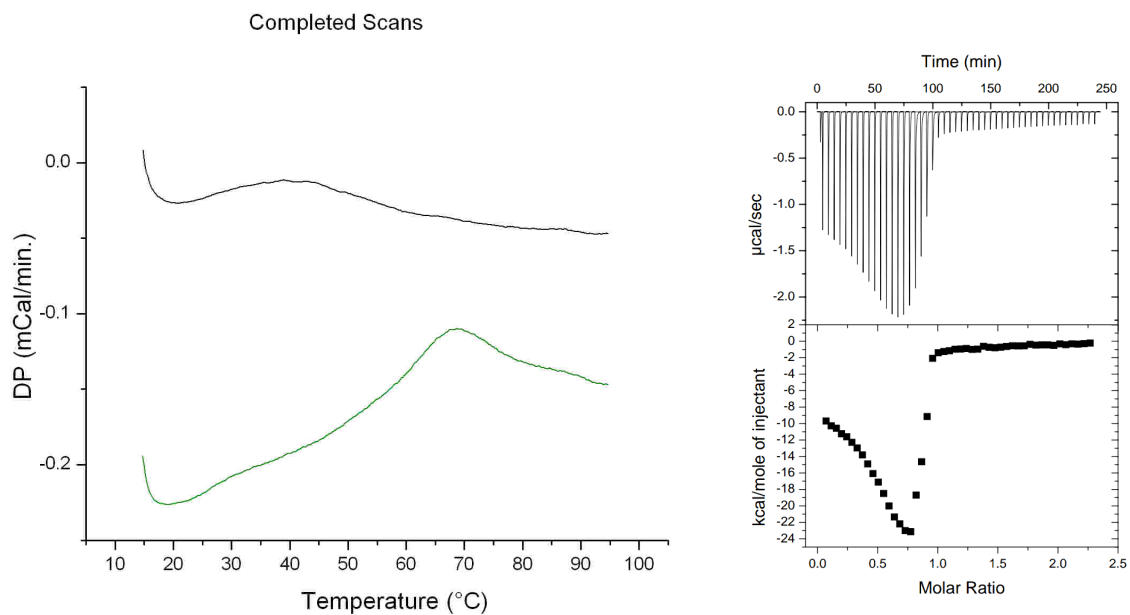

**Figure S4.** (left) DSC thermogram of insulin sample after ITC chelation measurement of  $T_3R_3$  (green), with buffer baseline scan (black); (right) ITC thermogram of EDTA chelation of  $T_3R_3$  insulin sample used for the DSC thermogram: 0.5 mM EDTA  $\rightarrow$  0.05 mM  $ZnCl_2$  + 0.150 mM human insulin monomer, 50 mM Tris buffer, pH 7.4,  $25 \pm 0.2$  °C.

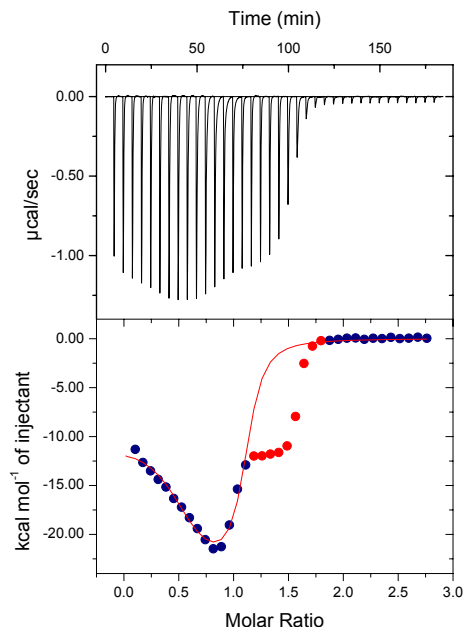

**Figure S5.** ITC thermogram of EDTA chelation of  $T_3R_3'$ ; 0.28 mM EDTA  $\rightarrow$  0.027 mM  $ZnCl_2$  + 0.013 mM  $CaCl_2$  + 0.08 mM human insulin monomer in 50 mM Tris buffer, pH 7.4,  $25 \pm 0.2$  °C; data attributed to  $Ca^{2+}$  chelation masked (red circles) for fit; best fit parameters using a two-sites binding model:  $n_1 = 0.50 \pm 0.01$ ,  $K_1 = 5.0 (\pm 0.6) \times 10^7$ ,  $\Delta H_1 = -10.6 \pm 0.3$  kcal·mol $^{-1}$ ; values for second site fixed at:  $n_2 = 0.58$ ,  $K_2 = 4.3 \times 10^6$ ,  $\Delta H_2 = -25$  kcal·mol $^{-1}$ .

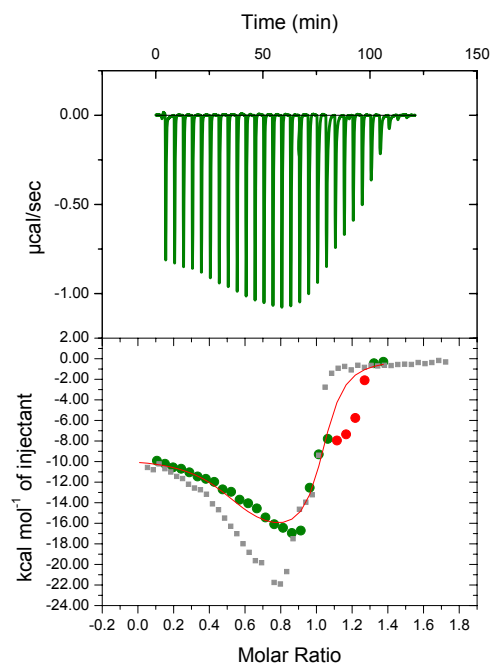

**Figure S6.** ITC thermogram of EDTA chelation of  $T_6$ ; 0.28 mM EDTA  $\rightarrow$  0.027 mM  $ZnSO_4$  + 0.08 mM human insulin monomer, 50 mM Tris buffer, pH 7.4,  $25 \pm 0.2$  °C; data attributed to chelation of trace ( $<3$   $\mu$ M)  $Ca^{2+}$  masked (red circles) for fit; best fit parameters using a two-sites binding model: values for first site fixed at  $n_1 = 0.513$ ,  $K_1 = 7 \times 10^7$ ,  $\Delta H_1 = -9.5$  kcal·mol $^{-1}$ ;  $n_2 = 0.51 \pm 0.01$ ,  $K_2 = 5 (\pm 1) \times 10^6$ ,  $\Delta H_2 = -18.6 \pm 0.3$  kcal·mol $^{-1}$ .

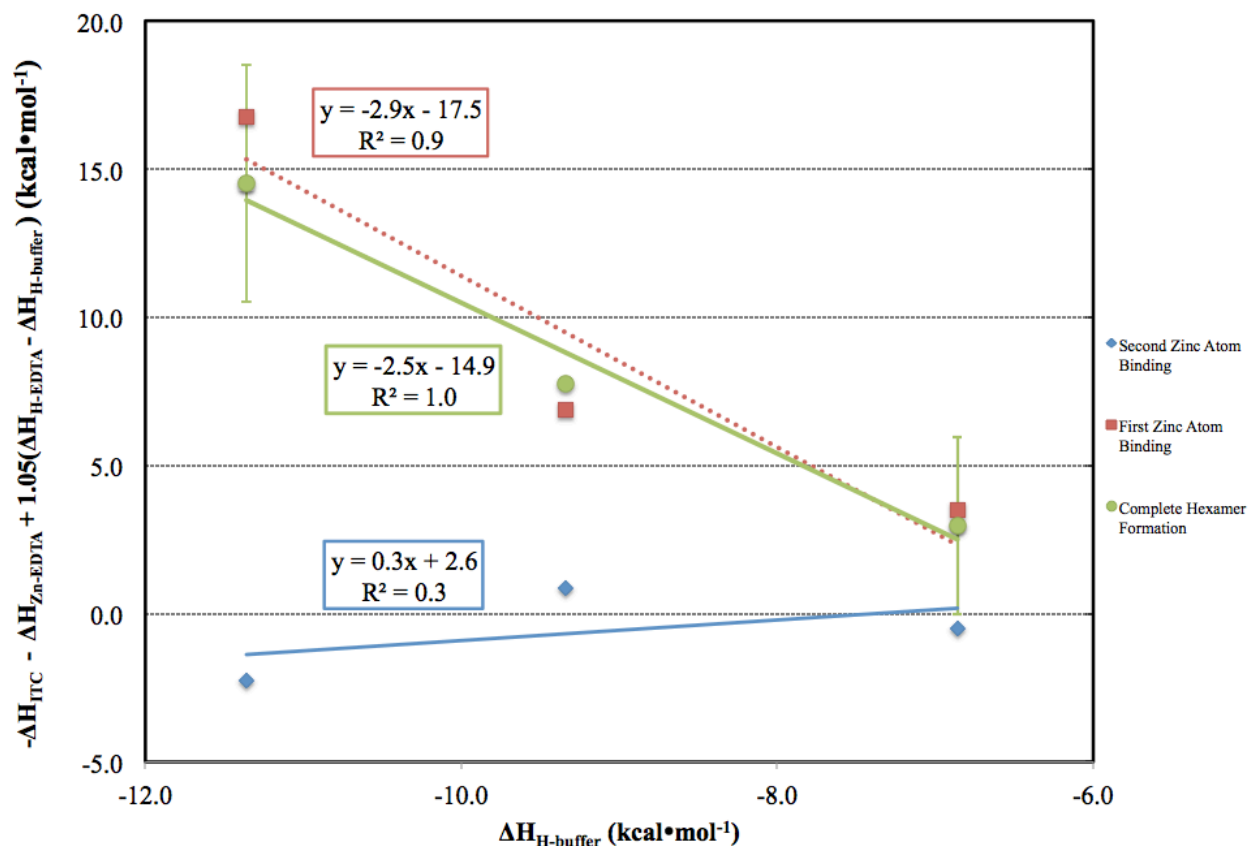

**Figure S7.** Plot of experimental ITC chelation enthalpies measured in Tris, Bis-Tris and ACES buffers to determine protonation/deprotonation contributions to the enthalpy at pH 7.4; red: first  $\text{Zn}^{2+}$  binding event; blue: second  $\text{Zn}^{2+}$  binding event; green: overall formation of the hexamer (sum of the two  $\text{Zn}^{2+}$  binding events). Plots are based on the sum of the contributions to the experimental enthalpy,

$$\Delta H_{ITC} = \Delta H_{EDTA-Zn} + 1.05(\Delta H_{Hbuffer} - \Delta H_{HEDTA}) + \Delta H_{Ins-Zn} + n(\Delta H_{Hbuffer})$$

which can be rearranged to give a linear relationship between the experimental enthalpy ( $\Delta H_{ITC}$ ) and the buffer protonation enthalpy ( $\Delta H_{Hbuffer}$ ).

$$\Delta H_{ITC} - \Delta H_{EDTA-Zn} + 1.05(\Delta H_{HEDTA} - \Delta H_{Hbuffer}) = n(\Delta H_{Hbuffer}) + \Delta H_{Ins-Zn}$$

A plot of the experimental enthalpy, corrected for enthalpy contributions from  $\text{Zn}^{2+}$  binding to EDTA ( $-\Delta H_{EDTA-Zn} + 1.05(\Delta H_{HEDTA} - \Delta H_{Hbuffer})$ ), versus the buffer protonation enthalpy has a slope indicating the number of protons ( $n$ ) binding to or released from insulin upon  $\text{Zn}^{2+}$  binding to the protein.

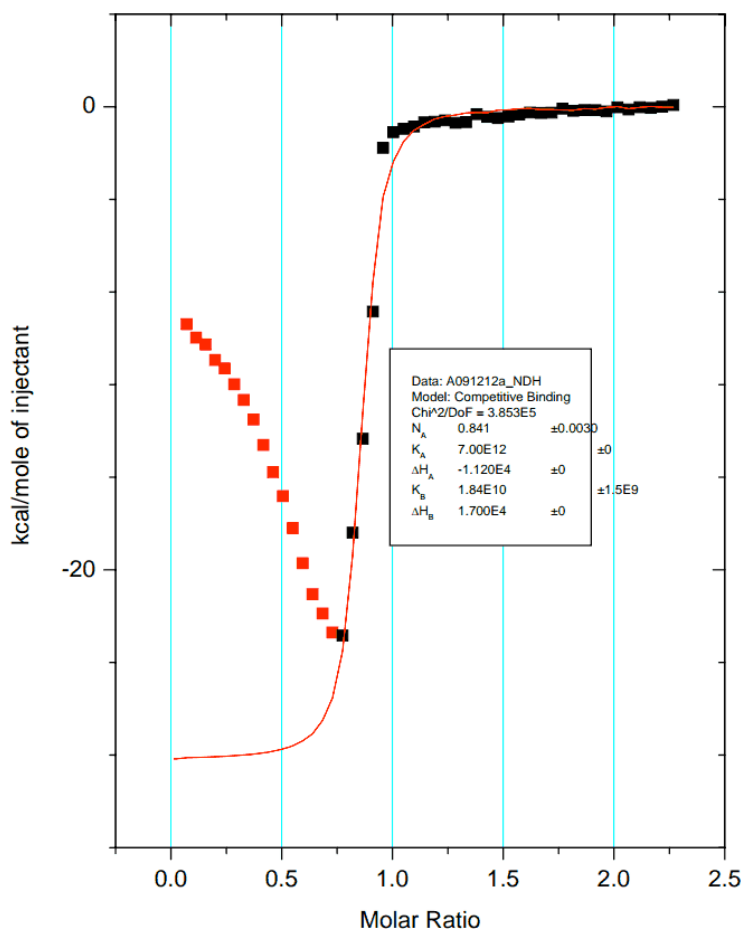

**Figure S8.** Best fit (red line) of the second event in the ITC thermogram of a representative EDTA chelation of  $T_3R_3$  insulin using a competition binding model to determine the insulin- $Zn^{2+}$  equilibrium constant; data due to the first event are masked (red squares) for the fit; input values for the fit are a) the stability constant of the EDTA- $Zn^{2+}$  complex ( $7.0 \times 10^{12}$ ), determined from literature values and the experimental conditions, b) the enthalpy of formation of the EDTA- $Zn^{2+}$  complex (-11.2 kcal/mol), determined independently for the experimental conditions, and c) the enthalpy of formation of the insulin- $Zn^{2+}$  complex (17.0 kcal/mol), determined from the best fit of the entire thermogram to a two-sites binding model; experimental conditions are 50 mM Tris buffer, pH 7.4,  $25 \pm 0.2$  °C.
